# Supplementary material
Source: Springer Nature journal article supplement (https://www.springermedizin.de/resource/supplementary/12957_2012_1020_MOESM4_ESM.pdf/9561622)

Proportion

## Overall Survival

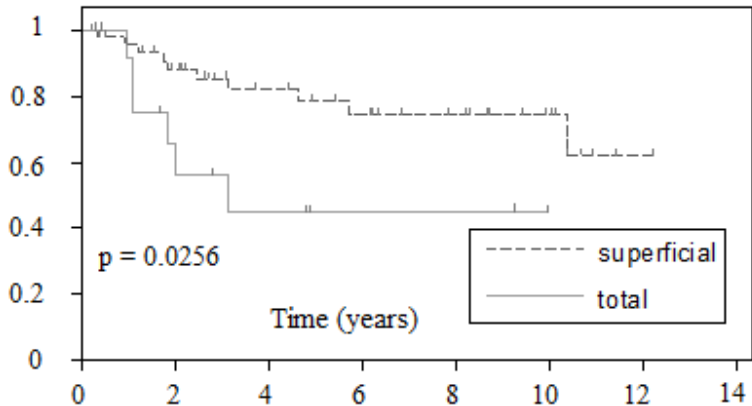

Numbers at Risk

|             |    |    |    |    |    |   |   |   |
|-------------|----|----|----|----|----|---|---|---|
| Superficial | 47 | 34 | 24 | 19 | 14 | 8 | 1 | 0 |
| Total       | 14 | 7  | 4  | 2  | 2  | 0 | 0 | 0 |

Supplement: MOESM4 [file 9561622]
